# Supplementary material for: Intimate partner violence and maternal depression during pregnancy: A community-based cross-sectional study in Ethiopia
Source: PubMed Central journal article supplement (PMC6668805; doi:10.1371/journal.pone.0220003), 2019-07-31
Supplement: pone.0220003.s001.pdf [file pone.0220003.s001.pdf]

## I: English version questionnaire

Read this information sheet and informed consent form to the participant.

Good morning/good afternoon.

My name is \_\_\_\_\_

I am a data collector for the study conducted in Wondo Genet Woreda to assess the health and social welfare of pregnant women and their newborns. We are based at Hawassa University. Your household has been selected by chance to participate in a research study on women's health, so if you agree I will ask some questions about your health and your use of health services. Your participation in this study is completely voluntary.

When the study is finished your name will be replaced by a number to keep your participation anonymized. You do not have to answer any of the questions if you do not want to, and you may end this talk at any time you want to. If you refuse to participate in this study it has no consequences for you. However, your honest answers to these questions we hope will help us improve women's health and the services provided.

You will not get any monetary/material benefit for participation in this study. If you agree to participate in the study, there will be an interview at the start (at enrollment), and two follow up visits later in pregnancy, and a visit as soon as possible after birth to measure the baby's birth weights

Do you have any questions? If you have any questions to be clarified further you can talk to the principal investigator Sewhareg Belay via +251 916 874105.

The interview may take 40 minutes.

Do you agree to be interviewed and followed up? Agree [  ] Disagree [  ]

### If Disagrees:

Thank the participant for her time and END the interview.

### If Agrees:

It is very important that we should talk in private, with only you and me (excluding visitors, neighbors, husband, relatives and children above two years)

Is now a good time to talk? Yes \_\_\_\_\_ No \_\_\_\_\_

Is this a good place to hold the interview? Yes \_\_\_\_\_ No \_\_\_\_\_

Or would you suggest another place to hold the interview?

If the time and the place are not convenient, take an appointment.

Appointment Date \_\_\_\_\_ Place \_\_\_\_\_

If the time and the place are convenient, continue the interview

Some of the topics are sensitive in nature and difficult to discuss, but many women have found it useful to have the opportunity to talk. Memorizing painful events may cause distress. Those women who need psychological support will be referred to Kela health center and Hawassa University referral hospital.

Name of interviewer-----Signature-----Date (Ethiopian) ----/----/----

Name of the Kebele \_\_\_\_\_ Respondent's code: \_\_\_\_\_

**Part I- Socio-demographic and economic characteristics of respondent.**

| No  | Questions                                              | Response                                                                                                                           |
|-----|--------------------------------------------------------|------------------------------------------------------------------------------------------------------------------------------------|
| 101 | Where is your place of residence?                      | Rural-----1<br>Urban-----2                                                                                                         |
| 102 | Your age in completed years                            | _____ Years                                                                                                                        |
| 103 | What is the highest education status you have attained | Not able to read and write-----1<br>Able to read and write-----2<br>Grade 1-6-----3<br>Grade 7-12-----4<br>college and above-----5 |
| 104 | What is your ethnic group?                             | Sidama-----1<br>Oromo-----2<br>Amhara-----3<br>Wolayta -----4<br>Gurage -----5<br>Others (specify)-----6                           |
| 105 | What is your husband's ethnic group?                   | Sidama-----1<br>Oromo-----2<br>Amhara-----3<br>Wolayta -----4<br>Gurage -----5<br>Others (specify)-----6                           |
| 106 | What is your religion                                  | Protestant -----1<br>Muslim-----2<br>Orthodox-----3<br>Catholic-----4<br>Traditional belief -----5<br>Others(specify)-----6        |
| 107 | What is your husband's religion                        | Protestant -----1<br>Muslim-----2<br>Orthodox-----3                                                                                |

|     |                                                                                 |                                                                                                                                    |
|-----|---------------------------------------------------------------------------------|------------------------------------------------------------------------------------------------------------------------------------|
|     |                                                                                 | Catholic-----4<br>Traditional belief -----5<br>Others(specify)-----6                                                               |
| 108 | What is your occupation?<br><b>Do not read the responses to the respondents</b> | Housewife -----1<br>Government employee-----2<br>Merchant -----3<br>Daily laborer-----4<br>Student-----5<br>Others(specify)-----6  |
| 109 | What is your current marital status?                                            | Never married-----1<br>Married-----2<br>Divorced-----3<br>Widowed-----4<br>Unmarried but in stable union----5<br>Separate-----6    |
| 110 | Duration with in marriage                                                       | _____years                                                                                                                         |
| 111 | How much is your estimated average monthly income?                              | _____Ethiopian birr                                                                                                                |
| 112 | Age at first marriage                                                           | _____years                                                                                                                         |
| 113 | Number of children born alive                                                   | ____ children in total<br>. _____ children with another man                                                                        |
| 114 | Is the current pregnancy desired by your partner                                | No-----1<br>Don't know-----2<br>Yes-----3                                                                                          |
| 115 | Was there ever violence between your parents?                                   | No-----0<br>Yes-----1                                                                                                              |
| 116 | Partner's educational status                                                    | Not able to read and write-----1<br>Able to read and write-----2<br>Grade 1-6-----3<br>Grade 7-12-----4<br>College and above-----5 |
| 117 | Partner's occupational status                                                   | Government employee-----1<br>Farmer-----2<br>Merchant -----3<br>Daily laborer-----4<br>Student-----5<br>Others(specify)-----6      |
| 118 | Did you drink alcohol in the last 30                                            | No-----0                                                                                                                           |

|     |                                                                                  |                       |
|-----|----------------------------------------------------------------------------------|-----------------------|
|     | days?                                                                            | Yes-----1             |
| 119 | If YES, how many days did you drink alcohol in the last 30 days?                 | _____ days            |
| 120 | Did your partner drink alcohol in the last 30 days?                              | No-----0<br>Yes-----1 |
| 121 | If YES, how many days did he drink alcohol in the last 30 days?                  | _____ days            |
| 122 | Did you chew Khat in the last 30 days?                                           | No-----0<br>Yes-----1 |
| 123 | If yes, then how many days did you chew Khat in the last 30 days                 | _____ days            |
| 124 | Did your partner chew Khat in the last 30 days?                                  | No-----0<br>Yes-----1 |
| 125 | If yes, then how many days did he chew Khat in the last 30 days                  |                       |
| 126 | Did you smoke cigarettes /used tobacco of any kind in the last 30 days?          | No-----0<br>Yes-----1 |
| 127 | If yes, then how many cigarettes did you smoked in the last 24 hours?            | _____ cigarettes      |
| 128 | Did your partner smoke cigarettes /used tobacco of any kind in the last 30 days? | No-----0<br>Yes-----1 |
| 129 | If yes, then how many cigarettes did he smoke in the last 24 hours?              | _____ cigarettes      |
| 130 | Last menstrual period(LMP)                                                       | On _____              |
| 131 | Gestational age in completed weeks estimated based on LMP                        | _____ weeks           |
| 132 | If LMP not known, guessed month                                                  | _____ months          |
| 133 | ANC follow up                                                                    | No-----0<br>Yes-----1 |
| 134 | Prior history of preterm                                                         | No-----0<br>Yes-----1 |
| 135 | Prior history of still birth                                                     | No-----0<br>Yes-----1 |
| 136 | Maternal Middle Upper Arm Circumference (MUAC)                                   | _____ in cm           |

**Part II: Emotional abuse by an intimate partner**

| No               | Questions                                                                                                                                                            | Responses             |
|------------------|----------------------------------------------------------------------------------------------------------------------------------------------------------------------|-----------------------|
| 201 <sub>a</sub> | Were you insulted by your partner or made to feel bad about yourself during the current pregnancy?                                                                   | Yes-----1<br>No-----0 |
| 201 <sub>b</sub> | Did you experience this type of violence at any time in the year before this pregnancy by your current partner?                                                      | Yes-----1<br>No-----0 |
| 202 <sub>a</sub> | Were you belittled by your partner or humiliated in front of other people during the current pregnancy?                                                              | Yes-----1<br>No-----0 |
| 202 <sub>b</sub> | Did you experience this type of violence at any time in the year before this pregnancy by your current partner?                                                      | Yes-----1<br>No-----0 |
| 203 <sub>a</sub> | Are things done by your partner to scare or intimidate you on purpose, e.g. by the way he looked at you, by yelling or smashing things during the current pregnancy? | Yes-----1<br>No-----0 |
| 203 <sub>b</sub> | Did you experience this type of violence at any time in the year before this pregnancy by your current partner?                                                      | Yes-----1<br>No-----0 |
| 204 <sub>a</sub> | Has your partner threatened to hurt someone you cared about during the current pregnancy?                                                                            | Yes-----1<br>No-----0 |
| 204 <sub>b</sub> | Did you experience this type of violence at any time in the year before this pregnancy by your current partner?                                                      | Yes-----1<br>No-----0 |

**Part III Physical violence by an intimate partner**

| No               | Questions                                                                                              | Responses             |
|------------------|--------------------------------------------------------------------------------------------------------|-----------------------|
| 301 <sub>a</sub> | Did your partner slap or had something thrown at you that could hurt you during the current pregnancy? | Yes-----1<br>No-----0 |
| 301 <sub>b</sub> | Did you experience this type of violence at any time in the year before this pregnancy by your current | Yes-----1<br>No-----0 |

|                  |                                                                                                                                  |                       |
|------------------|----------------------------------------------------------------------------------------------------------------------------------|-----------------------|
|                  | partner?                                                                                                                         |                       |
| 302 <sub>a</sub> | Did your partner pushed or shoved you during the current pregnancy?                                                              | Yes-----1<br>No-----0 |
| 302 <sub>b</sub> | Did you experience this type of violence at any time in the year before this pregnancy by your current partner?                  | Yes-----1<br>No-----0 |
| 303 <sub>a</sub> | Did your partner hit with fist or something else that could hurt you during the current pregnancy?                               | Yes-----1<br>No-----0 |
| 303 <sub>b</sub> | Did you experience this type of violence at any time in the year before this pregnancy by your current partner?                  | Yes-----1<br>No-----0 |
| 304 <sub>a</sub> | Did your partner kick, drag or beat you during the current pregnancy?                                                            | Yes-----1<br>No-----0 |
| 304 <sub>b</sub> | Did you experience this type of violence at any time in the year before this pregnancy by your current partner?                  | Yes-----1<br>No-----0 |
| 305 <sub>a</sub> | Did your partner choke or burn you on purpose during the current pregnancy?                                                      | Yes-----1<br>No-----0 |
| 305 <sub>b</sub> | Did you experience this type of violence at any time in the year before this pregnancy by your current partner?                  | Yes-----1<br>No-----0 |
| 306 <sub>a</sub> | Did your partner threaten to use (or actually use) a gun, knife, spear or other weapon against you during the current pregnancy? | Yes-----1<br>No-----0 |
| 306 <sub>b</sub> | Did you experience this type of violence at any time in the year before this pregnancy by your current partner?                  | Yes-----1<br>No-----0 |
| 307              | Were you ever punched or kicked in the abdomen during the current pregnancy?                                                     | Yes-----1<br>No-----0 |

**Part IV: Sexual violence by an intimate partner**

| No               | Questions                                                                                                                                                                                                                                  | Responses                                                                              |
|------------------|--------------------------------------------------------------------------------------------------------------------------------------------------------------------------------------------------------------------------------------------|----------------------------------------------------------------------------------------|
| 401 <sub>a</sub> | Were you physically forced to have sexual intercourse with your partner when you did not want to during the current pregnancy?                                                                                                             | Yes-----1<br>No-----0                                                                  |
| 401 <sub>b</sub> | Did you experience this type of violence at any time in the year before this pregnancy by your current partner?                                                                                                                            | Yes-----1<br>No-----0                                                                  |
| 402 <sub>a</sub> | Did you have sexual intercourse with your partner when you did not want to because you were afraid of what your partner might do during the current pregnancy?                                                                             | Yes-----1<br>No-----0                                                                  |
| 402 <sub>b</sub> | Did you experience this type of violence at any time in the year before this pregnancy by your current partner?                                                                                                                            | Yes-----1<br>No-----0                                                                  |
| 403 <sub>a</sub> | Were you forced by your partner to do something sexual that you found degrading or humiliating during the current pregnancy?                                                                                                               | Yes-----1<br>No-----0                                                                  |
| 403 <sub>b</sub> | Did you experience this type of violence at any time in the year before this pregnancy by your current partner?                                                                                                                            | Yes-----1<br>No-----0                                                                  |
| 404              | <b>If the woman answered yes to any of the violence questions (part II or part III or Part IV) then ask</b><br>Compared to before you were pregnant, did the violence get less, stay about the same, or get worse while you were pregnant? | Got less-----1<br>Stayed about the same-----2<br>Got worse-----3<br>I don't know-----4 |

**Part V: Feelings of depression.**

Tell us the way you have been feeling in the past seven days including today.

| S.No | Questions                                                                              | Responses                                                                                                                              |
|------|----------------------------------------------------------------------------------------|----------------------------------------------------------------------------------------------------------------------------------------|
| 501  | In the past seven days, have you been able to laugh and see the funny side of things?  | Yes As much as I always could-----0<br>Not quite so much now-----1<br>No Definitely not so much now-----2<br>Not (hardly) at all-----3 |
| 502  | In the past seven days, have you looked forward with enjoyment to things?              | Yes As much as I ever did-----0<br>Rather less than I used to-----1<br>No Definitely less than I used to-----2<br>Hardly at all-----3  |
| 503  | In the past seven days, have you blamed yourself unnecessarily when things went wrong? | No Not very often-----0<br>Never-----1<br>yes Most of the time-----2<br>Some of the time-----3                                         |
| 504  | In the past seven days, have you been anxious or worried for no good reason?           | No Not at all-----0<br>Hardly ever-----1<br>Yes Some times-----2<br>Very often-----3                                                   |
| 505  | In the past seven days, have you felt scared or panicky for no very good reason?       | No Not at all-----0<br>Not much-----1<br>Yes Some times-----2<br>Quite a lot-----3                                                     |



|     |                                                                                         |     |                                                                  |
|-----|-----------------------------------------------------------------------------------------|-----|------------------------------------------------------------------|
| 506 | In the past seven days, have things been getting on top of you?                         | No  | Coping as usual-----0<br>Mostly able -----1                      |
|     |                                                                                         | Yes | Sometimes unable-----2<br>Most of the time unable to cope -----3 |
| 507 | In the past seven days, have you been so unhappy that you have had difficulty sleeping? | No  | Not at all -----0<br>Not very often -----1                       |
|     |                                                                                         | Yes | Sometimes-----2<br>Most of the time -----3                       |
| 508 | In the past seven days, have you felt sad or miserable?                                 | No  | Not at all-----0<br>Not very often-----1                         |
|     |                                                                                         | Yes | Sometimes-----2<br>Most of the time-----3                        |
| 509 | In the past seven days, have you been so unhappy that you have been crying?             | No  | Never-----0<br>Only occasionally-----1                           |
|     |                                                                                         | Yes | Quite often-----2<br>Most of the time-----3                      |
| 510 | In the past seven days, has the thought of harming yourself occurred to you?            | No  | Never-----0<br>Hardly ever-----1                                 |
|     |                                                                                         | Yes | Sometimes-----2<br>Quite often-----3                             |

## Part VI: Social support received from different people

Tell us about the support you received from different people

|     |                                            | Always | Most of the time | Some of the time | Rarely | Never |
|-----|--------------------------------------------|--------|------------------|------------------|--------|-------|
| 601 | I have good friends who support me.        | 5      | 4                | 3                | 2      | 1     |
| 602 | My family is always there for me.          | 5      | 4                | 3                | 2      | 1     |
| 603 | My husband/partner helps me a lot.         | 5      | 4                | 3                | 2      | 1     |
| 604 | There is conflict with my husband/partner. | 1      | 2                | 3                | 4      | 5     |
| 605 | I feel controlled by my husband/partner.   | 1      | 2                | 3                | 4      | 5     |
| 606 | I feel loved by my husband/partner.        | 5      | 4                | 3                | 2      | 1     |

**Thank you for your time and effort in responding to these questions**

**End**

## II: Sidamu-Afoo language version questionnaire Tajenna qaali xa'mote sumuumme borro

### Tenne Tajenna qaali xa'mote sumuumme borro beeqqanchote nabawi

Keerella galitta/hositta. Su'miya \_\_\_\_\_. Wodo Gannatete Woradi giddo godowinni noo meentinna haaro ilamino qaaquulle lainohunni assinanni xiinxallora taje gamba asseemmate. Hedeweelcho ati tenne xiinxallo giddo beeqqatta gede dooramoota. Konni daafira xa'mote sumuu yiittaro fayyimmakkina fayyimmate sonqansho horonsi'rakki lainohunni boode xa'mo xa'meemmohe.

Horontanni baxxino coyi hee'ranno ikki gede su'mikki bayiicho kiirotenni riqimbanni. Su'mikkinna teessokki horontanni konni woraqati aana diborreessantanno; ikkeennano, Alliiitinohe ikki xa'muwa heedhuha ikkiro dawartooti. Tenne xiinxallo beeqa hogakkinnino iillannohe qarri dino. Ikkollana kayiinni ati aattanketi halaalaancho dawaro xiinxallonkenni noo qarra roorse afatenna amuwu aanna iillitanno gawajjo buxatanna maa assa hasiissannoro hedate qoleno woayaano coye kalaqatenna loosu aana hosiisate kaa'litanno. Ati aattanke taje tenne xiinxallo gobbaanni wole hajora horontanni dihosanno.

Beeqqaanchimmakkinni tenne xiinxallo giddonni afi'rattari womaashuno ikko uduunnichu irko horontanni dino. Xiinxallo beeqate summuu yiittaro hanafote xa'mo xa'meemmohe. Saeno, illate gamba yaatta goofimarchu agannara lame marro hinga mine towanteemmohe qoleno illatta woyiite dandiinummo derrinni qaaqu ayiirre bikkate mulenni towanteemmohe.

**Xa'mo afi'rootta? Xawinsannihe gede hasi'ratta xa'muwa nooheha ikkiro qara xiinxallancho bilbilte xa'ma dandaatta** (Sewhareg Balay= +251 916 874105).

Qaali xa'mo 40 daqiiqi geeshsha adhitara dandiitanno.

Xa'mamate sumuu yaatta? Ee [ ] Dee'ni [ ]

**sumuu yaa hoogguro** galatte kae uurrisi.

### Sumuu yituha ikkiro

Hojja hassawa lowo geesha hassisano . yaano atinna ani calla(ollu,minnikki anni, fiixikki woy oosso) nookiha yaate .

Xa hasaawate yanna injote? Ee [ ] Dee'ni [ ]

Bayiichu injannoke? Ee [ ] Dee'ni [ ]

Qaali xa'mote wolu injanno bayiichi no?

Yannanna bayiichu inja hoogiro dinye amaxxe. Dinyete barra\_\_\_\_\_ bayicho\_\_\_\_\_

Yannanna bayiichu injotero qaali xa'mo hanafi.

Mitte mitte xa'mo qorowo hasiisanootanna xa'mate ijjitanno ikkita ikkitara dandiitanno. Ikkollana kayiinni haammatu amuwi hasaawa dandaansa horote gedde la'anno.sainota qarru yanna qaaga dadillissansara dandiitanno. Wodanu hiiqqamme Amaale hassiissanno amuwi hee'riro keellu fayyimmate mereershanna hawassa yuniveriste rifeeraale hosipiitaale sonkanni.

**Sidaamu Afii Qaali-xa'muwa**

Xa'maanchote Su'ma \_\_\_\_\_ Malaate \_\_\_\_\_ Barra \_\_\_\_ / \_\_\_\_ / \_\_\_\_

Olluu Su'ma \_\_\_\_\_ Koode \_\_\_\_\_

**Biddissa I – Dawaraanchonniti dagoomittetenna miinju deerri akeeka.**

| <b>Kiir</b> | <b>Xa'muwa</b>                              | <b>Dawaro</b>                                                                                                                                              |
|-------------|---------------------------------------------|------------------------------------------------------------------------------------------------------------------------------------------------------------|
| 101         | Mama hee'ratta?                             | Baadiyyete-----1<br>Quchumaho-----2                                                                                                                        |
| 102         | Gunde sa'ni diri giddo dirikki me'e ikkino? | _____Diro                                                                                                                                                  |
| 103         | Roso ma deerra iillootta?                   | Nabbawanna borreessa didandemma----1<br>Nabbawanna borreessa dandemma-----2<br>1-6 Kifile -----3<br>7-12 Kifile -----4<br>Kolleejjenna hakkunni alee-----5 |
| 104         | Ga'rekki maati?                             | Sidaama-----1<br>Oromo-----2<br>Amaara-----3<br>Wolayitta -----4<br>Guraage -----5<br>Wole (qummi assi)-----6                                              |
| 105         | Ayiddaannikki ga're maati?                  | Sidaama-----1<br>Oromo-----2<br>Amaara-----3<br>Wolayitta -----4<br>Guraage -----5<br>Wole (qummi assi)-----6                                              |
| 106         | Amma'nokki maati?                           | Protestaante -----1<br>Islaama-----2<br>Ortodokise-----3<br>Kaatolike-----4<br>Budu amma'no-----5<br>Wole (qummi assi)-----6                               |

|     |                                                            |                                                                                                                                                                                  |
|-----|------------------------------------------------------------|----------------------------------------------------------------------------------------------------------------------------------------------------------------------------------|
| 107 | Ayiddaannikki ama'no maati?                                | Protestaante -----1<br>Islaama-----2<br>Ortodokise-----3<br>Kaatolike-----4<br>Budu amma'no-----5<br>Wole (qummi assi)-----6                                                     |
| 108 | Loosikki maati?<br><b>Dawaraasinete dawaro nabbabbooti</b> | Minaama -----1<br>Mangistete loosaasincho-----2<br>daddalaasincho -----3<br>Barru loosaasincho-----4<br>Rosaancho-----5<br>Wole (qummi assi)-----6                               |
| 109 | Adhammekki deerri hiitooho?                                | Horontanni diassi'roomma-----1<br>Assi'roomma-----2<br>Tidhamoomma-----3<br>Gunnittete-----4<br>Diassi'roomma, ikkennano geado<br>mittimma nooe -----5<br>Baxxe hee'reemna-----6 |
| 110 | Adhammetenni keeshshoota yanna<br>mageeshshite?            | _____diro                                                                                                                                                                        |
| 111 | Mereerima aganu eokki mageeshshaati?                       | _____Itophiyu birra                                                                                                                                                              |
| 112 | Assi'ritta woyte dirikki me''e ikkanno                     | _____diro                                                                                                                                                                        |
| 113 | Lubbotenni ilantino qaaquuli kiir me''ete?                 | xaphoomunni _____qaaquulle<br>Wolu anniwiinni _____ qaaquulle                                                                                                                    |
| 114 | Xa godowakki ayiddaannikki baxeenna<br>godowoo?            | Dibaxino-----1<br>Diafoomma-----2<br>Ee-----3                                                                                                                                    |
| 115 | Amakkinna annikki mereero gibbo affe<br>egennootta?        | Horontanni-----0<br>Ee-----1<br>Diafoomma-----2                                                                                                                                  |
| 116 | Ayiddaannikki rosi deerri maricho lawanno?                 | Nabbawanna borreessa didandaanno-----1<br>Nabbawanna borreessa dandaanno-----2<br>1-6 Kifile -----3<br>7-12 Kifile -----4<br>Kolleejjenna hakkunni alee-----5                    |
| 117 | Ayiddaannikki loosi deerri ma lawanno?                     | Mangistete looso-----1<br>Gawarete -----2<br>Daddalaasinchoho-----3                                                                                                              |

|     |                                                                                            |                                                                             |
|-----|--------------------------------------------------------------------------------------------|-----------------------------------------------------------------------------|
|     |                                                                                            | Barru loosaasinchooti-----4<br>Rosaanchoho-----5<br>Wole (qummi assi)-----6 |
| 118 | sai 30 barri giddo Dimbisannore agge egegnotta?                                            | Dee'ni-----0<br>Ee-----1                                                    |
| 119 | dawarose Ee ikkituro sai 30 barri giddo me'e barra ganyite agitta?                         | _____barra                                                                  |
| 120 | sai 30 barri giddo Ayiddaannikki dimbisannore agino?                                       | Dee'ni-----0<br>Ee-----1                                                    |
| 121 | dawarose "Ee" yaatuha ikkiro, sai 30 barri giddo mageeshshi barra ganye agino?             | _____barra                                                                  |
| 122 | sai 30 barri giddo caate itte egegnotta?                                                   | Dee'ni-----0<br>Ee-----1                                                    |
| 123 | dawarose Ee ikkituro sai 30 barri giddo me'e barra ganyite ititta?                         | _____barra                                                                  |
| 124 | sai 30 barri giddo ayidaannikki caate itte egegnewo?                                       | Dee'ni-----0<br>Ee-----1                                                    |
| 125 | dawarose Ee ikkituro sai 30 barri giddo ayyidaannikki caate me'e barra ganye itewo?        | _____barra                                                                  |
| 126 | sai 30 barri giddo sigaara /siqa wiliishite egegnotta?                                     | Dee'ni-----0<br>Ee-----1                                                    |
| 127 | dawarose Ee ikkituro sai 30 barri giddo me'e barra ganyite wiliishitta?                    | _____barra                                                                  |
| 128 | sai 30 barri giddo ayiddaannikki sigaara /siqa wiliishe egegnewo?                          | Dee'ni-----0<br>Ee-----1                                                    |
| 129 | dawarose Ee ikkituro sai 24 sa'aate giddo ayidaannikki sigara/siqa me'e sigaara williishi? | _____barra                                                                  |
| 130 | goofimarchoho Meyaricho Laootta Barri (MLB) mamooteti?                                     | _____nni                                                                    |
| 131 | Godowu agani lamalatenni.                                                                  | _____lamala                                                                 |

|     |                                                                   |                            |
|-----|-------------------------------------------------------------------|----------------------------|
| 132 | Meyaaricho laino yanna afa hoogguro qaaggano agana                | _____ agana                |
| 133 | Ilate albiidi amaalenna ha'runso xaa godowira assi'ra hanafootta? | Dee'ni -----0<br>Ee -----1 |
| 134 | Albi ilatta wpyte yanniweelo ilamino qaaqqi no?                   | Dinoe -----0<br>Ee -----1  |
| 135 | Godowi giddo baino qaaqqi dhagge afi'rootta?                      | Dee'ni-----0<br>Ee-----1   |
| 136 | Amate Dasu Doyicho Bikki (ADDB)                                   | _____ sentimetire (sm)     |

**Biddissa II: Ayiddaannuwiinnii iillitinoti akatu hekko.**

| <b>Kiiri</b> | <b>Xa'muwa</b>                                                                                                                           | <b>Dawaro</b>             |
|--------------|------------------------------------------------------------------------------------------------------------------------------------------|---------------------------|
| 201a         | Godowittahu kawa ayiddaannikki meessaneete giwatta gede woy hisatatta ikki gede xone egennohe?                                           | Ee -----1<br>Dee'ni-----0 |
| 201b         | konni godowi albaanni ayidaannikki sai dirira mamooteno ikkiro hattoo gawajjo iillishe egennewohe?                                       | Ee-----1<br>Dee'ni-----0  |
| 202a         | Godowittahu kawa ayiddaannikki wolu manni albaanni shollishe woy mannu woroonni ikkatta asse egennohe?                                   | Ee-----1<br>Dee'ni-----0  |
| 202b         | konni godowi albaanni ayidaannikki sai dirira mamooteno ikkiro hattoo gawajjo iillishe egennewohe?                                       | Ee-----1<br>Dee'ni-----0  |
| 203a         | Godowittahu kawa ayiddaannikki ate waajjishiishate yee assannori no? ( Lawishshu gede: la'anno garinni, raaretenni woy mitoricho olanni) | Ee-----1<br>Dee'ni-----0  |
| 203b         | konni godowi albaanni ayidaannikki sai dirira mamooteno ikkiro hattoo gawajjo iillishe egennewohe?                                       | Ee-----1<br>Dee'ni-----0  |
| 204a         | Godowittahu kawa ayiddaannikki ati lossi'ratta qaaqqo woy atewidoonni dayno manna gawajjate waajjishiishe egennohe?                      | Ee-----1<br>Dee'ni-----0  |

|      |                                                                                                       |                          |
|------|-------------------------------------------------------------------------------------------------------|--------------------------|
| 204b | konni godowi albaanni ayidaannikki sai dirira mamooteno ikkiro<br>hattoo gawajjo iillishe egennewohe? | Ee-----1<br>Dee'ni-----0 |
|------|-------------------------------------------------------------------------------------------------------|--------------------------|

**Biddissa III – Ayiddaannuwiinni iillitannoti ganate hekko. Woroonni uynoonniti baalanti xa’muwa xaa yannara noota godowate yanna illachishshanno.**

| <b>Kiiro</b> | <b>Xa’muwa</b>                                                                                           | <b>Dawaro</b>            |
|--------------|----------------------------------------------------------------------------------------------------------|--------------------------|
| 301a         | Godowittahu kawa ayiddaannikki qaawaade woy mitoricho ole<br>gawajje egenninohe?                         | Ee-----1<br>Dee'ni-----0 |
| 301b         | konni godowi albaanni ayidaannikki sai dirira mamooteno ikkiro<br>hattoo gawajjo iillishe egennewohe?    | Ee-----1<br>Dee'ni-----0 |
| 302a         | Godowittahu kawa ayiddaannikki tuge egenninohe?                                                          | Ee-----1<br>Dee'ni-----0 |
| 302b         | konni godowi albaanni ayidaannikki sai dirira mamooteno ikkiro<br>hattoo gawajjo iillishe egennewohe?    | Ee-----1<br>Dee'ni-----0 |
| 303a         | Godowittahu kawa ayiddaannikki tuntummotenni woy<br>gawajjahera dandaannorichinni gane egenninohe?       | Ee-----1<br>Dee'ni-----0 |
| 303b         | konni godowi albaanni ayidaannikki sai dirira mamooteno ikkiro<br>hattoo gawajjo iillishe egennewohe?    | Ee-----1<br>Dee'ni-----0 |
| 304a         | Godowittahu kawa ayiddaannikki lekkatenni gane, goshooshe<br>woy hekki asse geneggninohe?                | Ee-----1<br>Dee'ni-----0 |
| 304b         | konni godowi albaanni ayidaannikki sai dirira mamooteno ikkiro<br>hattoo gawajjo iillishe egennewohe?    | Ee-----1<br>Dee'ni-----0 |
| 305a         | Godowittahu kawa ayiddaannikki mitirichi ledi cife woy giire<br>egenninohe?                              | Ee-----1<br>Dee'ni-----0 |
| 305b         | konni godowi albaanni ayidaannikki sai dirira mamooteno ikkiro<br>hattoo gawajjo iillishe egennewohe?    | Ee-----1<br>Dee'ni-----0 |
| 306a         | Godowittahu kawa ayiddaannikki qawwetenni, billawunni woy<br>olu udiinnichinni waajjishiishe egenninohe? | Ee-----1<br>Dee'n-----0  |
| 306b         | konni godowi albaanni ayidaannikki sai dirira mamooteno ikkiro<br>hattoo gawajjo iillishe egennewohe?    | Ee-----1<br>Dee'ni-----0 |



|     |                                                                        |                          |
|-----|------------------------------------------------------------------------|--------------------------|
| 307 | konni godowi heedheenna ayidaannikki godowa hekki asse gane egenewohe? | Ee-----1<br>Dee'ni-----0 |
|-----|------------------------------------------------------------------------|--------------------------|

**Biddissa IV: Ayiddaannuwiinni iillitinoti siimu xaadi hekko**

| <b>Kiiro</b> | <b>Xa'muwa</b>                                                                                                                                                                                                              | <b>Dawaro</b>                                                          |
|--------------|-----------------------------------------------------------------------------------------------------------------------------------------------------------------------------------------------------------------------------|------------------------------------------------------------------------|
| 401a         | Godowittahu kawa ayiddaannikki hasi'rittakkinni siimu xaado assate wolqatenni gadache egenninohe?                                                                                                                           | Ee-----1<br>Dee'ni-----0                                               |
| 401b         | konni godowi albaanni ayidaannikki sai dirira mamooteno ikkiro hattoo gawajjo iillishe egenewohe?                                                                                                                           | Ee-----1<br>Dee'ni-----0                                               |
| 402a         | Godowittahu kawa ayiddaannikki ledi hasi'rittakkinni waajjitanninna mitorcho assannoe yaatenni yaaddanni siimu xaado assite egennootta?                                                                                     | Ee-----1<br>Dee'ni-----0                                               |
| 402b         | konni godowi albaanni ayidaannikki sai dirira mamooteno ikkiro hattoo gawajjo iillishe egenewohe?                                                                                                                           | Ee-----1<br>Dee'ni-----0                                               |
| 403a         | Godowittahu kawa ayiddaannikki siimu xaadi aana saalsiisannorena ayirrinye ba'atta gede gadadisiise egenninohe?                                                                                                             | Ee-----1<br>Dee'ni-----0                                               |
| 403b         | konni godowi albaanni ayidaannikki sai dirira mamooteno ikkiro hattoo gawajjo iillishe egenewohe?                                                                                                                           | Ee-----1<br>Dee'ni-----0                                               |
| 404          | ama aleeni noo xa'muwara (bidisha 1/bidisha2/bidisha3)mitte xa'mora nafa ee yite dawarturo aante noo xa'mo xa'mi. godowitta kawa iillitinohe gawajjo albi gawajo ledi heewisiinsiro ajjinonso albi gedeentilanso lexxitino? | ajjino_____1<br>albi gedentila__2<br>lexxitino_____3<br>diafoomma____4 |

**Biddissa V: Dadillu macciishshamme**

Sa’u lamalanni kayse techo barri geeshsha noohe macciishshamme kulinke.

| <b>Kiir</b> | <b>Xa’muwa</b>                                                                                                                                                                                                                                                     | <b>Dawaro</b>                                                                                                                                                                                                                     |
|-------------|--------------------------------------------------------------------------------------------------------------------------------------------------------------------------------------------------------------------------------------------------------------------|-----------------------------------------------------------------------------------------------------------------------------------------------------------------------------------------------------------------------------------|
| 501         | Sa’u lamala giddo oso’lanna ososhiishshanno coyibba la’ate kaayyo afi’rootta? Lawaishshu gede ososhiishshannorichi ososhiishshannohe?                                                                                                                              | Baalanka woyte asseemma gede dandumma geeshsha----0<br>Xa nafa hakka geeshsha di’ikkino -----1<br>Addintanni coyi’niro xa horontanni hattoori dino-----2<br>Co’ontanni (lowo geeshsha qarrunni) -----3                            |
| 502         | Sa’u lamala giddo coyibba hagiirrunni la’atta? Lawishshu gede saakki godobbeenna qaltanno barra quqquxamatenni agaratta? Wole lawishsha la’nummoro dikko uurritano barra quqquxamatenni agadhatta? Wole kore lawannore la’atta woyte tashshi yaannohe/hagiidhatta? | Dandumma geeshsha baalanka woyte asseemma-----0<br>Konni albaanni assa hoogummarono mito mito woyte -----1<br>Addintanni konni albaanni asse egennoommakki garinni---2<br>Horontanni asse diegennoomma (lowo geeshsha qarrunni) 3 |
| 503         | Sa’u lamala giddo baino coyra mullurrinni hunate macciishshamme macciishshantannohe? Lawishshu gede qaaqqikki xissamiro meessakki hunootta assite hedatta?                                                                                                         | Ee, low yannara -----0<br>Ee, mito mito woyte -----1<br>Lowonta ganye diasseemma-----2<br>Dee’ni, horontanni-----3                                                                                                                |
| 504         | Sa’u lamala giddo mullurrinni ka’e yaadatta?                                                                                                                                                                                                                       | Dee’ni, di-yaadoomma-----0<br>Hili geeshsha nafa yaade diegennoomma-----1<br>Ee, mito mito woyte -----2<br>Ee, lowo geeshsha ganye -----3                                                                                         |

|     |                                                                      |                                                                                                                                                                                                                                                     |
|-----|----------------------------------------------------------------------|-----------------------------------------------------------------------------------------------------------------------------------------------------------------------------------------------------------------------------------------------------|
| 505 | Sa'u lamala giddo mullurinni ka'e masatta?                           | Dee'ni, di-yaadoomma -----0<br>Dee'ni, mase diyoomma -----1<br>Ee, mito mito woyte -----2<br>Ee, addinta lowo geeshsha -----3                                                                                                                       |
| 506 | Sa'u lamala giddo coy baalu wolqakki aleenni ikkinoha lawannohe?     | Dee'ni, alba asseemante gede fulaalla noomma -----0<br>Dee'ni, lowo yannara aninni dancha gede guxxeemma ----1<br>Ee, mito mito woyte albinte gede meessi'ya guxxe fule diafeemma -----2<br>Ee, lowo yanna dhuki'ya aleenni ikkinoha lawannoenka..3 |
| 507 | Sa'u lamala giddo ikkado goxano afi'ra hoogatenni hisanyo hoogootta? | Dee'ni, horontanni -----0<br>Duucha woyte di''ikkino -----1<br>Ee, mito mito woyte -----2<br>Ee, lowo yanna -----3                                                                                                                                  |
| 508 | Sa'u lamala giddo yaaddo macciishshantinohe?                         | Dee'ni, horontanni -----0<br>Lowonta diganyitino-----1<br>Ee, mito mito woyte-----2<br>Ee, lowo yanna-----3                                                                                                                                         |
| 509 | Sa'u lamalanni kayisse wi'latta geeshsha dadillootta?                | Dee'ni, horontanni -----0<br>Sae sae calla -----1<br>Ee, Lowo geshsha ganye-----2<br>Ee, lowo yanna-----3                                                                                                                                           |
| 510 | Sa'u lamala giddo meessakki gawajjate hedo daggannohe?               | Horontanni-----0<br>Hedenni diegennoomma-----1<br>Mito mito woyte-----2                                                                                                                                                                             |

|  |  |                               |
|--|--|-------------------------------|
|  |  | Ee, lowo geeshsha ganye-----3 |
|--|--|-------------------------------|

**BiddissaVI: Mannuwiinni afi’roommati dagoomitte kaa’lo**

Babbaxxino manniwiinni afi’rootta kaa’lo kulinke

| <b>Kiiro</b> | <b>Xa’muwa</b>                                | <b>Duucha<br/>woyte</b> | <b>Lowo<br/>yanna</b> | <b>Mito mito<br/>woyte</b> | <b>Sae<br/>sae</b> | <b>Horontanni</b> |
|--------------|-----------------------------------------------|-------------------------|-----------------------|----------------------------|--------------------|-------------------|
| 601          | Kaa’litannoere dancha<br>jaalla afi’roomma.   | 5                       | 4                     | 3                          | 2                  | 1                 |
| 602          | Qarramuma woyte baala<br>maate’ya ledoo nooe. | 5                       | 4                     | 3                          | 2                  | 1                 |
| 603          | Ayiddaanni’ya lowo<br>geeshsha kaa’lannoe.    | 5                       | 4                     | 3                          | 2                  | 1                 |
| 604          | Ayiddaanni’ya ledoo gibbo<br>afi’roomma.      | 1                       | 2                     | 3                          | 4                  | 5                 |
| 605          | Ayiddaanni’ya hekki<br>assinoeha lawannoe.    | 1                       | 2                     | 3                          | 4                  | 5                 |
| 606          | Ayiddaanni’ya baxannoeha<br>lawannoe.         | 5                       | 4                     | 3                          | 2                  | 1                 |

**Yannakki uyte xa’muwa’ya dawarootta daafiranna irkakkira lowo geeshsha galateeffateemmahe**

**Gumulo**

III: Amharic language version questionnaire

መረጃ መስጫና ፍቃደኝነት መጠየቂያ ቅፅ

ይህን የመረጃ መስጫና ፍቃደኝነት መጠየቂያ ቅፅ ለተሳታፊዎ ያንብቡላቸው።

ከቡር ተሳታፊ

እንደምን አደሩ/ዋሉ

ስሜ-----ይባላል። ስለ ነፍሰጡር ሴቶች እና ስለሚወልዱላቸው ህፃናት ጤና እና ማህበራዊ ደህንነት ለማወቅ በወንድ ገነት ለሚካሄደው ጥናት መረጃ ሰብሳቢ ነኝ።እንደ እድል ሆኖ እርስዎ እዚህ ጥናት ውስጥ እንዲሳተፉ ተመርጠዋል።ስለዚህ ከተስማሙ ስለ ጤንነትዎ እና የጤና አገልግሎት አጠቃቀምዎ ጥቂት ጥያቄዎችን እጠይቅዎታለሁ።እዚህ ጥናት ውስጥ የሚሳተፉት ግን ፍቃደኛ ሲሆኑ ብቻ ነው።

አንዳችንም ልዩ ነገር እንዳይኖር ጥናቱ ሲያበቃ ስምዎት በቁጥር ይተካል።ስምዎት እዚህ ቅፅ ላይ አይፃፍም ። የማይመችዎትን የትኛውንም ጥያቄ ያለመመለስ ይችላሉ እንዲሁም ይህንን ቃለ መጠይቅ በየትኛው ሰአት ማቆም ይችላሉ። ጥናት ውስጥ አልሳተፍም በማለትዎ የሚደርስብዎት ነገር የለም። ነገር ግን ለጥያቄዎቹ የሚሰጡን እውነተኛ መልስ ችግሩን የበለጠ እንድንረዳና ተመሳሳይ ችግር የሚደርስባቸውን ለመርዳት መፍትሄ ለማቀድ እና ለመተግበር ይረዳናል። የሚሰጡን መረጃ ከምርምር ስራ ዉጪ ለምንም ተግባር አይዉልም።ሚስጥራዊነቱ ሙሉ በሙሉ የተጠበቀ ነዉ።

ጥናት ውስጥ በመሳተፍዎ የሚያገኙት የገንዘብም ሆነ የቁስ ጥቅም የለም።ጥናቱ ውስጥ ለመሳተፍ ከተስማሙ በመጀመሪያ ጥናቱ ውስጥ ሲካተቱ ቃለ-መጠይቅ ይደረግልዎታል። ከዚያም በእርግዝናዎ የመጨረሻ ወራት ሁለት የክትትል ጉብኝት እና ከወሊድ በኋላ የህፃኑን ክብደት ለመለካት በተቻለ መጠን በፍጥነት ጉብኝት ይኖረዎታል።

ጥያቄ ይኖርዎታል? እንዲብራራልዎት የሚፈልጉት ጥያቄ ካለ ዋናዎን የጥናቱን ተመራማሪ ሰውሀረግ በላይን በዚህ የስልክ ቁጥር(+251 916 874 105 ) መጠየቅ ይችላሉ።

ቃለ መጠይቁ 40 ደቂቃ ሊወስድ ይችላል።

በዚህ ጥናት ውስጥ ለመሳተፍ ይስማማሉ?  አስማማለሁ( ) አልስማማም( )

አልስማማም ካሉ:

ተሳታፊዎን ለጊዜያቸው አመስግነዉ ያቁሙ።:

እስማማለሁ ካሉ:

ለብቻችን ማውራት በጣም አስፈላጊ ነው። ማለትም እኔና እርስዎ ብቻ (ጎረቤት፣ባለቤትዎት፣ ዘመድ ወይም ልጆች ሳይኖሩ)

አሁን ለመነጋገር ምቹ ጊዜ ነው? አዎን( ) አይደለም( )

ቃለ-መጠይቁን ለማድረግ ቦታውስ ምቹ ነው? አዎን( ) አይደለም( )

ቃለ-መጠይቁን ለማድረግ የሚጠቁሙን ሌላ ምቹ ቦታ ይኖራል?

ጊዜውና ቦታው ካልተመቸ ሌላ ቀጠሮ ይውሰዱ። የቀጠሮ ቀን----- የቀጠሮ ቦታ-----

ጊዜውና ቦታው ከተመቸ ቃለ-መጠይቁን ይቀጥሉ

አንዳንዶቹ ርዕሶች ጥንቃቄ የሚሹ እና ለመነጋገር የሚከብዱ ሊሆኑ ይችላሉ። ነገርግን ብዙዎቹ ሴቶች ማውራት መቻላቸውን እንደ ጥቅም ያዩታል። አስቸጋሪ ሁኔታዎችን ማስታወስ ሊያስከፋ ይችላል። የስነልቦና ድጋፍ የሚፈልጉ ሴቶች ወደ ኬላ ጤና አጠባበቅ ጣቢያ እና ሀዋሳ ዩኒቨርሲቲ ሪፈራል ሆስፒታል ይላካሉ።

**አማርኛ መጠይቅ**

ቃለ መጠይቁን የሚጠይቅ ሰው ስም----- ፊርማ----- ቀን-----/-----/-----

ቀበሌ-----

ክድ-----

**ክፍል አንድ፡ ማህበራዊ እና አካባቢያዊ ጥያቄዎች**

| ተ.ቁ | ጥያቄዎች                | መልስ                                                                                                               |
|-----|----------------------|-------------------------------------------------------------------------------------------------------------------|
| 101 | የመኖሪያ ቦታዎ የት ነው?     | ገጠር -----1<br>ከተማ-----2                                                                                           |
| 102 | እድሜዎ ስንት ነው?         | -----አመት                                                                                                          |
| 103 | የትምህርት ደረጃዎ ምንድን ነው? | ማንበብ እና መጻፍ የማትችል-----1<br>ማንበብ እና መጻፍ የምትችል-----2<br>1-6 የተማረች-----3<br>7-12 የተማረች -----4<br>ኮሌጅ እና ከዛ በላይ-----5 |
| 104 | የምን ብሔር አባል ነዎት?     | ሲዳማ-----1<br>አሮሞ-----2<br>አማራ-----3<br>ወላይታ-----4<br>ጉራጌ-----5<br>ሌላ(ይጥቀሱ)-----6                                  |

|     |                                   |                                                                                                   |
|-----|-----------------------------------|---------------------------------------------------------------------------------------------------|
| 105 | ባለቤትዎ የምን ብሄር አባል ነው?             | ሲዳማ-----1<br>አሮሞ-----2<br>አማራ-----3<br>ወላይታ-----4<br>ጉራጌ-----5<br>ሌላ(ይጥቀሱ)-----6                  |
| 106 | የምን ሀይማኖት ተከታይ ነዎት?               | ፕሮቴስታንት-----1<br>ሙስሊም-----2<br>ኦርቶዶክስ-----3<br>ካቶሊክ-----4<br>ባህላዊ እምነት-----5<br>ሌላ(ይጥቀሱ)-----6    |
| 107 | ባለቤትዎ የምን ሀይማኖት ተከታይ ነው?          | ፕሮቴስታንት-----1<br>ሙስሊም-----2<br>ኦርቶዶክስ-----3<br>ካቶሊክ-----4<br>ባህላዊ እምነት-----5<br>ሌላ(ይጥቀሱ)-----6    |
| 108 | ስራዎ ምንድን ነው?<br>(ምርጫዎቹን አያንቡቡላቸው) | የቤት እመቤት-----1<br>የመንግስት ተቀጣሪ-----2<br>ነጋዴ-----3<br>የቀን ስራተኛ-----4<br>ተማሪ-----5<br>ሌላ(ይጥቀሱ)-----6 |

|     |                                     |                                                                                                                                   |
|-----|-------------------------------------|-----------------------------------------------------------------------------------------------------------------------------------|
| 109 | የጋብቻ ሁኔታዎ ምንድን ነው?                  | ያላገባችኋል-----1<br>ያገባችኋል-----2<br>የተፋታችኋል-----3<br>ባል የሞተባችኋል-----4<br>በህግ ሳይጋቡ በአንድ ጣራ ስር የሚኖሩ-----5<br>በህግ ሳይለያዩ ተፋተው የሚኖሩ-----6 |
| 110 | በጋብቻ ውስጥ ስንት አመታት ቆዩ?               | _____ አመታት                                                                                                                        |
| 111 | የወር ገቢዎ በግምት ምን ያህል ነው (በብር)?       | _____ ብር                                                                                                                          |
| 112 | የመጀመሪያ ባለቤቶቻችን ሲያገቡ እድሜዎ ስንት ነበር?   | _____ አመት                                                                                                                         |
| 113 | በህይወት የተወለዱ ልጆች ብዛት                 | በጠቅላላ _____ ልጆች<br>ከሌላ አባት _____ ልጆች                                                                                              |
| 114 | ይህን እርግዝና ባለቤቶቻችን/አጋርዎች ይፈልጉታል?     | አይደለም-----1<br>አላውቅም-----2<br>አዎ-----3                                                                                            |
| 115 | በወላጆቻችን መካከል ጥቃት አጋጥሞ ያውቃል?         | አይደለም-----0<br>አዎ-----1                                                                                                           |
| 116 | የባለቤቶቻችን/አጋርዎ የትምህርት ደረጃ ምን ያህል ነው? | ማንበብ እና መጻፍ የሚችል-----1<br>ማንበብ እና መጻፍ የሚችል-----2<br>1-6 የተማረ-----3<br>7-12 የተማረ-----4<br>ኮሌጅ እና ከዛ በላይ-----5                      |
| 117 | የባለቤቶቻችን/አጋርዎ ስራ ምንድን ነው?           | የመንግስት ተቀጣሪ-----1<br>ገበሬ-----2<br>ነጋዴ-----3                                                                                       |



|     |                                                            |                                               |
|-----|------------------------------------------------------------|-----------------------------------------------|
|     |                                                            | የቀን ሰራተኛ-----4<br>ተማሪ-----5<br>ሌላ(ይጥቀሱ)-----6 |
| 118 | ባለፉት 30 ቀናት ውስጥ የአልኮል መጠጥ ጠጥተው ያውቃሉ ወይ?                    | አይደለም-----0<br>አዎን-----1                      |
| 119 | መልሳቸው አዎን ከሆነ ባለፉት 30 ቀናት ውስጥ ምን ያህል ቀናት ጠጡ?               | _____ ቀናት                                     |
| 120 | ባለፉት 30 ቀናት ውስጥ ባለቤትዎት የአልኮል መጠጥ ጠጥተው ያውቃሉ ወይ?             | አይደለም-----0<br>አዎን-----1                      |
| 121 | መልሳቸው አዎን ከሆነ ባለፉት 30 ቀናት ውስጥ ባለቤትዎት ምን ያህል ቀናት ጠጡ?        | _____ ቀናት                                     |
| 122 | ባለፉት 30 ቀናት ውስጥ ጫት ቅመው ያውቃሉ ወይ?                            | አይደለም-----0<br>አዎን-----1                      |
| 123 | መልሳቸው አዎን ከሆነ ባለፉት 30 ቀናት ውስጥ ምን ያህል ቀናት ጫት ቃሙ?            | _____ ቀናት                                     |
| 124 | ባለፉት 30 ቀናት ውስጥ ባለቤትዎት ጫት ቅመው ያውቃሉ ወይ?                     | አይደለም-----0<br>አዎን-----1                      |
| 125 | መልሳቸው አዎን ከሆነ ባለፉት 30 ቀናት ውስጥ ባለቤትዎት ምን ያህል ቀናት ጫት ቃሙ?     | _____ ቀናት                                     |
| 126 | ባለፉት 30 ቀናት ውስጥ ሲጋራ/እንደ ትንባሆ የሚጨስ ነገር አጨሰው ያውቃሉ ወይ?        | አይደለም-----0<br>አዎን-----1                      |
| 127 | መልሳቸው አዎን ከሆነ ባለፉት 24 ሰዓት ውስጥ ስንት ሲጋራ አጨሰሱ?                | _____ ሲጋራ                                     |
| 128 | ባለፉት 30 ቀናት ውስጥ ባለቤትዎት ሲጋራ/እንደ ትንባሆ የሚጨስ ነገር አጨሰው ያውቃሉ ወይ? | አይደለም-----0<br>አዎን-----1                      |
| 129 | መልሳቸው አዎን ከሆነ ባለቤትዎት ባለፉት 24 ሰዓት ውስጥ ስንት ሲጋራ አጨሰሱ?         | _____ ሲጋራ                                     |

|     |                                     |                          |
|-----|-------------------------------------|--------------------------|
| 130 | ለመጨረሻ ጊዜ ያዩት የወር አበባ መፍሰስ የጀመረበት ቀን | በ _____                  |
| 131 | የእርግዝናው እድሜ በሳምንት                   | _____ ሳምንታት              |
| 132 | በግምት የእርግዝናው እድሜ በወራት               | _____ ወራት                |
| 133 | የነፍስ ጡር ክትትል ማድረግ ጀምረዋል?            | አይደለም-----0<br>አዎን-----1 |
| 134 | ከዚህ በፊት ያለ ጊዜው የተወለደ ልጅ ነበረዎት?      | አይደለም-----0<br>አዎን-----1 |
| 135 | ከዚህ በፊት ሞቶ የተወለደ ልጅ ነበረዎት?          | አይደለም-----0<br>አዎን-----1 |
| 136 | የእናቲቱ የላይኛው ክንድ ዙሪያ በሳንቲ ሜትር ሲለካ    | _____ ሳንቲ ሜትር            |

**ክፍል ሁለት፡ በባለቤት/በአጋር የሚደርስ ስሜታዊ ጥቃት**

| ተ.ቁ              | ጥያቄዎች                                                                       | መልስ                      |
|------------------|-----------------------------------------------------------------------------|--------------------------|
| 201 <sub>v</sub> | በዚህ እርግዝና ወቅት በባለቤትዎ ተሰድበው፤ ተዘልፈው ወይም ስለራስዎ መጥፎ ስሜት እንዲሰማዎ ተደርገው ያውቃሉ ወይ?   | አዎን-----1<br>አይደለም-----0 |
| 201 <sub>ሐ</sub> | ከዚህ እርግዝና በፊት በባለፈው አመት በማንኛውም ጊዜ በአሁኑ ባለቤትዎ እንደዚህ አይነት ጥቃት አጋጥሞዎት ያውቃል ወይ? | አዎን-----1<br>አይደለም-----0 |
| 202 <sub>v</sub> | በዚህ እርግዝና ወቅት ባለቤትዎ በሌሎች ሰዎች ፊት አንሰው እንዲታዩ ወይም እንዲዋረዱ አደርገዎት ያውቃሉ ወይ?       | አዎን-----1<br>አይደለም-----0 |
| 202 <sub>ሐ</sub> | ከዚህ እርግዝና በፊት በባለፈው አመት በማንኛውም ጊዜ በአሁኑ ባለቤትዎ እንደዚህ አይነት ጥቃት አጋጥሞዎት ያውቃል ወይ? | አዎን-----1<br>አይደለም-----0 |

|                  |                                                                                   |                          |
|------------------|-----------------------------------------------------------------------------------|--------------------------|
| 203 <sub>ሀ</sub> | በዚህ እርግዝና ወቅት ባለቤትዎ ሆን ብሎ እርስዎን ለማስፈራራት ወይም ለማስደንገጥ ነገሮችን ያደርጋሉ ወይ? ለምሳሌ በአስተያየት፤ | አዎን-----1<br>አይደለም-----0 |
| 203 <sub>ለ</sub> | ከዚህ እርግዝና በፊት በባለፈው አመት በማንኛውም ጊዜ በአሁኑ ባለቤትዎት እንደዚህ አይነት ጥቃት አጋጥሞዎት ያውቃል ወይ?      | አዎን-----1<br>አይደለም-----0 |
| 204 <sub>ሀ</sub> | በዚህ እርግዝና ወቅት ባለቤትዎ እርስዎ የሚወዱትን ሰው ለመጉዳት ተፈታትኖዎት ያውቃሉ ወይ?                         | አዎን-----1<br>አይደለም-----0 |
| 204 <sub>ለ</sub> | ከዚህ እርግዝና በፊት በባለፈው አመት በማንኛውም ጊዜ በአሁኑ ባለቤትዎት እንደዚህ አይነት ጥቃት አጋጥሞዎት ያውቃል ወይ?      | አዎን-----1<br>አይደለም-----0 |

**ክፍል ሶስት፡ በባለቤት/በአጋር የሚደርስ አካላዊ ጥቃት፡፡ ከዚህ በታች የቀረቡት ጥያቄዎች በሙሉ የሚያመለክቱት ስለ አሁኑ እርግዝና ብቻ ነው፡፡**

| ተ.ቁ              | ጥያቄዎች                                                                        | መልስ                      |
|------------------|------------------------------------------------------------------------------|--------------------------|
| 301 <sub>ሀ</sub> | ባለቤትዎ በጥፊ መቶዎት ወይም ሊጎዳዎት የሚችል ነገር በዚህ እርግዝና ወቅት ወርውሮብዎት ያውቃሉ ወይ?             | አዎን-----1<br>አይደለም-----0 |
| 301 <sub>ለ</sub> | ከዚህ እርግዝና በፊት በባለፈው አመት በማንኛውም ጊዜ በአሁኑ ባለቤትዎት እንደዚህ አይነት ጥቃት አጋጥሞዎት ያውቃል ወይ? | አዎን-----1<br>አይደለም-----0 |
| 302 <sub>ሀ</sub> | በዚህ እርግዝና ወቅት ባለቤትዎ ገፍቶዎት ወይም በሀይል ገፍቶዎት ያውቃሉ ወይ?                            | አዎን-----1<br>አይደለም-----0 |
| 302 <sub>ለ</sub> | ከዚህ እርግዝና በፊት በባለፈው አመት በማንኛውም ጊዜ በአሁኑ ባለቤትዎት እንደዚህ አይነት ጥቃት አጋጥሞዎት ያውቃል ወይ? | አዎን-----1<br>አይደለም-----0 |
| 303 <sub>ሀ</sub> | በዚህ እርግዝና ወቅት ባለቤትዎ በቡጢ ወይም በሌላ ሊጎዳዎ በሚችል ነገር መቶዎት ያውቃሉ ወይ?                  | አዎን-----1<br>አይደለም-----0 |
| 303 <sub>ለ</sub> | ከዚህ እርግዝና በፊት በባለፈው አመት በማንኛውም ጊዜ በአሁኑ ባለቤትዎት እንደዚህ አይነት ጥቃት አጋጥሞዎት ያውቃል ወይ? | አዎን-----1<br>አይደለም-----0 |
| 304 <sub>ሀ</sub> | በዚህ እርግዝና ወቅት ባለቤትዎ ረገጦዎት፤ ጎትቶዎት ወይም መቶዎት ያውቃሉ ወይ?                           | አዎን-----1<br>አይደለም-----0 |

|                  |                                                                              |                          |
|------------------|------------------------------------------------------------------------------|--------------------------|
| 304 <sub>ላ</sub> | ከዚህ እርግዝና በፊት በባለፈው አመት በማንኛውም ጊዜ በአሁኑ ባለቤትዎት እንደዚህ አይነት ጥቃት አጋጥሞዎት ያውቃል ወይ? | አዎን-----1<br>አይደለም-----0 |
| 305 <sub>ሀ</sub> | በዚህ እርግዝና ወቅት ባለቤትዎ ሆን ብሎ አንቆዎት ወይም አቃጥሎዎት ያውቃል ወይ?                          | አዎን-----1<br>አይደለም-----0 |
| 305 <sub>ለ</sub> | ከዚህ እርግዝና በፊት በባለፈው አመት በማንኛውም ጊዜ በአሁኑ ባለቤትዎት እንደዚህ አይነት ጥቃት አጋጥሞዎት ያውቃል ወይ? | አዎን-----1<br>አይደለም-----0 |
| 306 <sub>ሀ</sub> | በዚህ እርግዝና ወቅት ባለቤትዎ በመሳሪያ ወይም በቢሊዎ ሊጎዳዎት ሞክሮ ወይም ጎድቶዎት ያውቃል ወይ?              | አዎን-----1<br>አይደለም-----0 |
| 306 <sub>ለ</sub> | ከዚህ እርግዝና በፊት በባለፈው አመት በማንኛውም ጊዜ በአሁኑ ባለቤትዎት እንደዚህ አይነት ጥቃት አጋጥሞዎት ያውቃል ወይ? | አዎን-----1<br>አይደለም-----0 |
| 307              | በዚህ እርግዝና ወቅት ሆድሽ ላይ በጡጫ ተመተሽ ታውቂያለሽ ወይ?                                     | አዎን-----1<br>አይደለም-----0 |

**ክፍል አራት፡ በባለቤት/በአጋር የሚደርስ ወሲባዊ ጥቃት፡፡ ከዚህ በታች የቀረቡት ጥያቄዎች በሙሉ የሚያመለክቱት ስለ አሁኑ እርግዝና ብቻ ነው፡፡**

| ተ.ቁ              | ጥያቄዎች                                                                              | መልስ                      |
|------------------|------------------------------------------------------------------------------------|--------------------------|
| 401 <sub>ሀ</sub> | በዚህ እርግዝና ወቅት ባለቤትዎ በአካል አስገድዶዎት የግብረ ስጋ ግንኙነት አድርገው ያውቃል ወይ?                      | አዎን-----1<br>አይደለም-----0 |
| 401 <sub>ለ</sub> | ከዚህ እርግዝና በፊት በባለፈው አመት በማንኛውም ጊዜ በአሁኑ ባለቤትዎት እንደዚህ አይነት ጥቃት አጋጥሞዎት ያውቃል ወይ?       | አዎን-----1<br>አይደለም-----0 |
| 402 <sub>ሀ</sub> | በዚህ እርግዝና ወቅት ባለቤትዎ የሆነ ነገር ሊያደርግ ይችላል ብለው ፈርተው ሳይፈልጉ የግብረ ስጋ ግንኙነት አድርገው ያውቃል ወይ? | አዎን-----1<br>አይደለም-----0 |
| 402 <sub>ለ</sub> | ከዚህ እርግዝና በፊት በባለፈው አመት በማንኛውም ጊዜ በአሁኑ ባለቤትዎት እንደዚህ አይነት ጥቃት አጋጥሞዎት ያውቃል ወይ?       | አዎን-----1<br>አይደለም-----0 |

|                  |                                                                                                                                                        |                                                        |
|------------------|--------------------------------------------------------------------------------------------------------------------------------------------------------|--------------------------------------------------------|
| 403 <sub>ሀ</sub> | በዚህ እርግዝና ወቅት በባለቤትዎ ተገደው ወሲባዊ የሆነ ዝቅ የሚያደርግ ወይም የሚያዋርድ ነገር አድርገው ያውቃሉ ወይ?                                                                             | አዎን-----1<br>አይደለም-----0                               |
| 403 <sub>ለ</sub> | ከዚህ እርግዝና በፊት በባለፈው አመት በማንኛውም ጊዜ በአሁኑ ባለቤትዎት እንደዚህ አይነት ጥቃት አጋጥሞዎት ያውቃል ወይ?                                                                           | አዎን-----1<br>አይደለም-----0                               |
| 404              | እናትየው ከላይ ካሉት ጥያቄዎች(ክፍል ሁለት/ክፍል ሶስት/ክፍል አራት) ለአንዱም አዎ ብላ ከመለሰች ቀጥሎ ያለውን ጥያቄ ይጠይቁ ከማርገዝዎ በፊት ከነበረው ጋር ሲወዳደር አሁን በእርግዝናው ጊዜ ጥቃቱ ቀንሷል ወይስ ያው ነው ወይስ ጨምሯል? | ቀንሷል-----1<br>ያው ነው-----2<br>ጨምሯል-----3<br>አላውቅም-----4 |

**ክፍል አምስት: የመደበር/የመከፋት ስሜት**

**ባለፉት ሰባት ቀናት ውስጥ ዛሬን ጨምሮ ይሰማዎት የነበረውን ስሜት ይንገሩን።**

| ተ.ቁ | ጥያቄዎች                                                                                                            | ምላሾች                                                                                                                   |
|-----|------------------------------------------------------------------------------------------------------------------|------------------------------------------------------------------------------------------------------------------------|
| 501 | ባለፉት ሰባት ቀናት ውስጥ ለመሳቅና የነገሮችን አስቂኝ ጎን ለማየት ችለው ነበር?<br><br>ለምሳሌ እንደተለመደው በሚያስቁዎት ነገሮች ላይ መሳቅ ችለው ነበር?            | አዎን በተቻለኝ መጠን ሁሌም እንደማደርገው-----0<br>አሁን እንኳን ያን ያክል አይደለም-----1<br>አይደለም በእርግጥ አሁን ያን ያክል አይደለም-----2<br>እንዲያውም -----3 |
| 502 | ባለፉት ሰባት ቀናት ውስጥ ነገሮችን በመደሰት ይመለከቱ ነበር?<br><br>ለምሳሌ ላምዎት ብታረግዝ የምትወልደበትን በጉጉት ይጠብቃሉ? ሌላ ምሳሌ የገበያ ቀንን በጉጉት ይጠብቃሉ? | አዎን በተቻለኝ መጠን ሁሌም እንደማደርገው -----0<br>አደርገው ከነበረው ባነሰ -----1<br>አይደለም በእርግጥ አደርገው ከነበረው ባነሰ-----2<br>እንዲያውም -----3      |
| 503 | ባለፉት ሰባት ቀናት ውስጥ ነገሮች ሲበለሻሹ ራስዎን አላግባብ ኮንነው ነበር?<br><br>ለምሳሌ ልጅዎት ቢታመም                                           | አይደለም በጣም ብዙ ጊዜ አይደለም-----0<br>በፍጹም አይደለም-----1                                                                        |

|     |                                                       |                                                                                                                                      |
|-----|-------------------------------------------------------|--------------------------------------------------------------------------------------------------------------------------------------|
|     | ራስዎን ይኮንናሉ?                                           | አዎን በጣም ብዙ ጊዜ-----2<br>አንዳንዴ-----3                                                                                                   |
| 504 | ባለፉት ሰባት ቀናት ውስጥ ያለ በቂ ምክንያት ተጨንቀው ነበር?               | አይደለም በፍጹም-----0<br>እምብዛም/ላመል-----1<br>አዎን አንዳንዴ-----2<br>በጣም በተደጋጋሚ-----3                                                           |
| 505 | ባለፉት ሰባት ቀናት ውስጥ ያለ በቂና በጣም ጥሩ ምክንያት ፍርሃት ተሰምቶዎት ነበር? | አይደለም በፍጹም-----0<br>ብዙም አይደለም-----1<br>አዎን አንዳንዴ -----2<br>በጣም ብዙ ጊዜ-----3                                                           |
| 506 | ባለፉት ሰባት ቀናት ውስጥ ነገሮች ሁሉ ተመስቃቅለውብዎት ነበር?              | አይደለም እንደ ሁል ጊዜው እየተወጣሁት ነው -----0<br>ብዙ ጊዜ በጥሩ ሁኔታ እወጣለሁ-----1<br>አዎን አንዳንዴ እንደ ሁል ጊዜው አልወጣም-----2<br>በአብዛኛው እንደ ሁል ጊዜው አልወጣም-----3 |
| 507 | ባለፉት ሰባት ቀናት ውስጥ እንቅልፍ ከማጣትዎት የተነሳ ደስተኛ አልነበሩም?       | አይደለም አይደረግም-----0<br>በተደጋጋሚ አይደለም -----1<br>አዎን አንዳንዴ-----2<br>በአብዛኛው-----3                                                         |
| 508 | ባለፉት ሰባት ቀናት ውስጥ ሀዘን ተሰምቶዎት ነበር?                      | አይደለም አይደረግም-----0<br>በተደጋጋሚ አይደለም -----1<br>አዎን አንዳንዴ-----2<br>በአብዛኛው-----3                                                         |
| 509 | ባለፉት ሰባት ቀናት ውስጥ በጣም ሀዘን ስለተሰማዎት አለቅሰው ነበር?           | አይደለም በፍጹም-----0<br>አንዳንድ ጊዜ ብቻ-----1                                                                                                |

|     |                                            |                  |
|-----|--------------------------------------------|------------------|
|     |                                            | አዎን በተደጋጋሚ-----2 |
|     |                                            | በአብዛኛው -----3    |
| 510 | ባለፉት ሰባት ቀናት ውስጥ እራስዎን የመጉዳት ሃሳብ አስበው ነበር? | አይደለም በፍጹም-----0 |
|     |                                            | በመጠኑ ሁሌም-----1   |
|     |                                            | አዎን አንዳንዴ -----2 |
|     |                                            | በተደጋጋሚ-----3     |

**ክፍል ስድስት: ከተለያዩ ሰዎች የተገኘ ማህበራዊ ድጋፍ**

ከተለያዩ ሰዎች ስለአገኙት ማህበራዊ ድጋፍ ይንገሩን

|     |                                         | ሁልጊዜ | አብዛኛውን ጊዜ | አንዳንድ ጊዜ | አልፎ አልፎ | በጭራሽ |
|-----|-----------------------------------------|------|-----------|----------|---------|------|
| 601 | የሚረዱዎት መልካም ጓደኞች አሉዎት?                  | 5    | 4         | 3        | 2       | 1    |
| 602 | ቤተሰብዎት ሊረዳዎት ሁልጊዜ በቅርብ ይገኛል?            | 5    | 4         | 3        | 2       | 1    |
| 603 | ባለቤትዎት/አጋርዎት በጣም ይረዱዎታል?                | 5    | 4         | 3        | 2       | 1    |
| 604 | በእርስዎ እና በባለቤትዎት/አጋርዎት መካከል አለመግባባት አለ? | 1    | 2         | 3        | 4       | 5    |
| 605 | ባለቤትዎት/አጋርዎት እንደሚቆጣጠርዎት ይሰማዎታል?         | 1    | 2         | 3        | 4       | 5    |
| 606 | በባለቤትዎት/አጋርዎት እንደሚፈቀሩ ይሰማዎታል?           | 5    | 4         | 3        | 2       | 1    |

ጊዜዎትን ሰውተው ጥያቄዎቹን ለመመለስ ላደረጉት ጥረት እናመሰግናለን።

አበቃ
